# Supplementary material for: The Prevalence of Liver Fibrosis Stages on More than 23,000 Liver Stiffness Measurements by Vibration-Controlled Transient Elastography: A Single Center Study
Source: MDPI journal article supplement (doi:10.3390/diagnostics13172803), 2023-08-30
Supplement: s1 [file s1]

**Supplementary table S1:** Descriptive statistics for patients with viral hepatitis. For each year, the number of enrolled patients is specified, with their age at enrollment and the number of LSM values recorded across the analyzed 13-year period

| Number of patients               | Total<br>N=2054 | HBV<br>inactive<br>N=134 | HBV<br>N=584     | HCV<br>N=1275  | HBV +<br>HCV<br>N=19 | HBV +<br>HDV<br>N=42 |
|----------------------------------|-----------------|--------------------------|------------------|----------------|----------------------|----------------------|
| 2007: N<br>enrolled              | 214             | 20                       | 44               | 142            | 3                    | 5                    |
| Number<br>of LSMs <sup>(a)</sup> | 4 (2–5)         | 3 (2–4.5)                | 2.5 (2–4)        | 3 (2–5)        | 3 (2.5–6)            | 4 (2–4)              |
| Age in<br>years <sup>(a)</sup>   | 52 (44–<br>60)  | 50 (36–<br>54)           | 46 (33–<br>54)   | 55 (49–<br>64) | 49 (47–<br>50)       | 44 (43–<br>52)       |
| Sex M <sup>(b)</sup>             | 85<br>(39.7%)   | 13 (65%)                 | 24<br>(54.5%)    | 44 (31%)       | 1<br>(33.3%)         | 3 (60%)              |
| 2008: N<br>enrolled              | 360             | 26                       | 92               | 223            | 6                    | 13                   |
| Number<br>of LSMs <sup>(a)</sup> | 3 (2–5)         | 2.5 (2–4)                | 3 (2–5)          | 2 (2–3)        | 2 (2–2)              | 2 (2–3)              |
| Age in<br>years <sup>(a)</sup>   | 53 (43–<br>59)  | 36.5 (26–<br>47)         | 47 (31–<br>54.5) | 55 (49–<br>61) | 57 (50–<br>64)       | 51 (46–<br>54)       |
| Sex M <sup>(b)</sup>             | 172<br>(47.8%)  | 13 (50%)                 | 62<br>(67.4%)    | 88<br>(39.5%)  | 1<br>(16.7%)         | 8<br>(61.5%)         |
| 2009: N<br>enrolled              | 278             | 19                       | 79               | 167            | 6                    | 7                    |
| Number<br>of LSMs <sup>(a)</sup> | 3 (2–4)         | 2 (2–2.5)                | 2 (2–3.5)        | 3 (2–4)        | 3 (2–6)              | 3 (2–5)              |
| Age in<br>years <sup>(a)</sup>   | 52 (43–<br>58)  | 48 (33–<br>53)           | 46 (36–<br>55)   | 53 (47–<br>60) | 58 (49–<br>74)       | 52 (52–<br>53.5)     |
| Sex M <sup>(b)</sup>             | 108<br>(38.8%)  | 12<br>(63.2%)            | 46<br>(58.2%)    | 46<br>(27.5%)  | 3<br>(50.0%)         | 1<br>(14.3%)         |
| 2010: N<br>enrolled              | 183             | 19                       | 50               | 108            | 1                    | 5                    |
| Number<br>of LSMs <sup>(a)</sup> | 3 (2–4)         | 3 (2–4)                  | 2 (2–3)          | 3 (2–4)        | 3                    | 3 (2–3)              |
| Age in<br>years <sup>(a)</sup>   | 51 (42–<br>57)  | 37 (30–<br>51)           | 43.5<br>(30–53)  | 53 (47–<br>60) | 65                   | 56 (51–<br>57)       |
| Sex M <sup>(b)</sup>             | 80<br>(43.7%)   | 9<br>(47.4%)             | 28<br>(56.0%)    | 40<br>(37.0%)  | –                    | 3<br>(60.0%)         |
| 2011: N<br>enrolled              | 164             | 13                       | 48               | 97             | 1                    | 5                    |

|                               |              |                |              |               |          |              |
|-------------------------------|--------------|----------------|--------------|---------------|----------|--------------|
| Number of LSMs <sup>(a)</sup> | 3 (2–4)      | 2 (2–3)        | 3 (2–3)      | 3 (2–4)       | 2        | 3 (2–4)      |
| Age in years <sup>(a)</sup>   | 54 (43.5–60) | 45 (32–54)     | 52 (33–56.5) | 56 (49–63)    | 57       | 49 (45–53)   |
| Sex M <sup>(b)</sup>          | 68 (41.5%)   | 6 (46.2%)      | 25 (52.1%)   | 35 (36.1%)    | –        | 2 (40.0%)    |
| 2012: N enrolled              | 150          | 8              | 42           | 97            | –        | 3            |
| Number of LSMs <sup>(a)</sup> | 3 (2–4)      | 2 (2–2.5)      | 3 (2–4)      | 3 (2–4)       | –        | 3 (2.5–4)    |
| Age in years <sup>(a)</sup>   | 54 (45–59)   | 42.5 (25.5–61) | 49 (34–54)   | 56 (50–61)    | –        | 59 (56–60.5) |
| Sex M <sup>(b)</sup>          | 68 (45.3%)   | 6 (75.0%)      | 26 (61.9%)   | 35 (36.1%)    | –        | 1 (33.3%)    |
| 2013: N enrolled              | 133          | 5              | 46           | 81            | 1        | –            |
| Number of LSMs <sup>(a)</sup> | 2 (2–4)      | 2 (2–4)        | 2 (2–3)      | 2 (2–4)       | 2        | –            |
| Age in years <sup>(a)</sup>   | 55 (47–62)   | 36 (27–38)     | 52 (35–58)   | 57 (54–64)    | 33       | –            |
| Sex M <sup>(b)</sup>          | 53 (39.8%)   | 2 (40.0%)      | 25 (54.3%)   | 25 (30.9%)    | 1 (100%) | –            |
| 2014: N enrolled              | 121          | 3              | 48           | 67            | 1        | 2            |
| Number of LSMs <sup>(a)</sup> | 2 (2–3)      | 2 (2–2.5)      | 2 (2–3)      | 2 (2–3)       | 2        | 3 (2–4)      |
| Age in years <sup>(a)</sup>   | 56 (42–63)   | 38 (31.5–41)   | 45.5 (35–56) | 61 (52.50–67) | 66       | 57 (53–61)   |
| Sex M <sup>(b)</sup>          | 44 (36.4%)   | 2 (66.7%)      | 23 (47.9%)   | 18 (26.9%)    | –        | 1 (50%)      |
| 2015: N enrolled              | 88           | 7              | 26           | 53            | –        | 2            |
| Number of LSMs <sup>(a)</sup> | 3 (2–4)      | 3 (2–3)        | 2 (2–3)      | 3 (2–4)       | –        | 3.5 (3–4)    |
| Age in years <sup>(a)</sup>   | 54 (45.5–62) | 57 (42.5–63)   | 46.5 (38–54) | 58 (51–65)    | –        | 57.5 (54–61) |
| Sex M <sup>(b)</sup>          | 29 (39.9%)   | 4 (57.1%)      | 10 (38.5%)   | 15 (28.3%)    | –        | –            |

|                               |                |                |            |              |   |   |
|-------------------------------|----------------|----------------|------------|--------------|---|---|
| 2016: N enrolled              | 153            | 8              | 41         | 104          | – | – |
| Number of LSMs <sup>(a)</sup> | 2 (2–3)        | 2 (2–3)        | 2 (2–2)    | 3 (2–3)      | – | – |
| Age in years <sup>(a)</sup>   | 58 (50–64)     | 55.5 (42–66)   | 49 (36–59) | 60 (55–66)   | – | – |
| Sex M <sup>(b)</sup>          | 62 (40.5%)     | 2 (25.0%)      | 22 (53.7%) | 38 (36.5%)   | – | – |
| 2017: N enrolled              | 112            | 3              | 38         | 71           | – | – |
| Number of LSMs <sup>(a)</sup> | 2 (2–3)        | 2              | 2 (2–2)    | 3 (2–3)      | – | – |
| Age in years <sup>(a)</sup>   | 61 (51.5–67)   | 61 (58.5–63.5) | 53 (44–58) | 64 (59–70.5) | – | – |
| Sex M <sup>(b)</sup>          | 43 (38.4%)     | –              | 19 (50.0%) | 24 (33.8%)   | – | – |
| 2018: N enrolled              | 96             | 3              | 30         | 63           | – | – |
| Number of LSMs <sup>(a)</sup> | 2 (2–3)        | 2              | 2          | 3 (2–3)      | – | – |
| Age in years <sup>(a)</sup>   | 60 (51.5–66.5) | 35 (35–51.5)   | 58 (36–64) | 60 (56–68)   | – | – |
| Sex M <sup>(b)</sup>          | 36 (37.5%)     | 1 (33.3%)      | 14 (46.7%) | 21 (33.3%)   | – | – |
| 2019: N enrolled              | 2              | –              | –          | 2            | – | – |
| Number of LSMs <sup>(a)</sup> | 2              | –              | –          | 2            | – | – |
| Age in years <sup>(a)</sup>   | 63             | –              | –          | 63           | – | – |
| Sex M <sup>(b)</sup>          | –              | –              | –          | –            | – | – |

<sup>(a)</sup> either median (IQR) or the value when it was constant; <sup>(b)</sup> N (%)

**Supplementary table S2:** Descriptive statistics for patients with autoimmune disease. For each year, the number of enrolled patients is specified, with their

age at enrollment and the number of LSM values recorded across the analyzed 13-year period

| <b>Number of patients</b>     | <b>Total</b><br>N=82 | <b>AIH</b><br>N=29 | <b>PBC</b><br>N=53 |
|-------------------------------|----------------------|--------------------|--------------------|
| <b>2007: N enrolled</b>       | 9                    | 4                  | 5                  |
| Number of LSMs <sup>(a)</sup> | 4 (2–5)              | 5 (3–7.5)          | 3 (2–4)            |
| Age in years <sup>(a)</sup>   | 55 (51–60)           | 56 (53–58.5)       | 55 (51–61)         |
| Sex M <sup>(b)</sup>          | 1 (11.1%)            | 1 (25%)            | –                  |
| <b>2008: N enrolled</b>       | 23                   | 6                  | 17                 |
| Number of LSMs <sup>(a)</sup> | 4 (2–5)              | 3 (2–4)            | 5 (2–5)            |
| Age in years <sup>(a)</sup>   | 52 (44.5–58.5)       | 53 (47–60)         | 52 (42–57)         |
| Sex M <sup>(b)</sup>          | 1 (4.3%)             | –                  | 1 (5.9%)           |
| <b>2009: N enrolled</b>       | 13                   | 5                  | 8                  |
| Number of LSMs <sup>(a)</sup> | 3 (2–5)              | 4 (3–5)            | 2 (2–4.5)          |
| Age in years <sup>(a)</sup>   | 52 (43–54)           | 54 (53–56)         | 46.5 (30.5–51.5)   |
| Sex M <sup>(b)</sup>          | 1 (7.7%)             | 1 (20.0%)          | –                  |
| <b>2010: N enrolled</b>       | 7                    | 1                  | 6                  |
| Number of LSMs <sup>(a)</sup> | 5 (2–5)              | 2                  | 5 (2–5)            |
| Age in years <sup>(a)</sup>   | 55 (52–63.5)         | 68                 | 54 (52–59)         |
| Sex M <sup>(b)</sup>          | 2 (28.6%)            | –                  | 2 (33.3%)          |
| <b>2011: N enrolled</b>       | 8                    | 3                  | 5                  |
| Number of LSMs <sup>(a)</sup> | 3 (2–4)              | 3 (3–3.5)          | 3 (2–4)            |
| Age in years <sup>(a)</sup>   | 57.5 (47–63.5)       | 64 (63.5–68)       | 55 (39–55)         |
| Sex M <sup>(b)</sup>          | 2 (25.0%)            | 1 (33.3%)          | 1 (20.0%)          |
| <b>2012: N enrolled</b>       | 2                    | 2                  | –                  |
| Number of LSMs <sup>(a)</sup> | 5 (3–7)              | 5 (3–7)            | –                  |
| Age in years <sup>(a)</sup>   | 46.5 (37–56)         | 46.5 (37–56)       | –                  |
| Sex M <sup>(b)</sup>          | –                    | –                  | –                  |
| <b>2013: N enrolled</b>       | 7                    | 3                  | 4                  |

|                               |                |              |                  |
|-------------------------------|----------------|--------------|------------------|
| Number of LSMs <sup>(a)</sup> | 3 (2–3)        | 3 (2.5–3)    | 2.5 (2–4)        |
| Age in years <sup>(a)</sup>   | 54 (49–54)     | 54 (49.5–54) | 53.5 (39.5–60.5) |
| Sex M <sup>(b)</sup>          | 1 (14.3%)      | –            | 1 (25.0%)        |
| <b>2014: N enrolled</b>       | 3              | 2            | 1                |
| Number of LSMs <sup>(a)</sup> | 2 (2–3)        | 2            | 2                |
| Age in years <sup>(a)</sup>   | 58 (38–65)     | 38 (18–58)   | 72               |
| Sex M <sup>(b)</sup>          | 2 (66.7%)      | 1 (50.0%)    | 1 (100%)         |
| <b>2015: N enrolled</b>       | 1              | –            | 1                |
| Number of LSMs <sup>(a)</sup> | 2              | –            | 2                |
| Age in years <sup>(a)</sup>   | 62             | –            | 62               |
| Sex M <sup>(b)</sup>          | –              | –            | –                |
| <b>2016: N enrolled</b>       | 4              | 3            | 1                |
| Number of LSMs <sup>(a)</sup> | 2 (2–3)        | 2 (2–3)      | 2                |
| Age in years <sup>(a)</sup>   | 56 (35–70)     | 70 (56–70)   | 28               |
| Sex M <sup>(b)</sup>          | 1 (25%)        | 1 (33.3%)    | –                |
| <b>2017: N enrolled</b>       | 1              | –            | 1                |
| Number of LSMs <sup>(a)</sup> | 3              | –            | 3                |
| Age in years <sup>(a)</sup>   | 47             | –            | 47               |
| Sex M <sup>(b)</sup>          | –              | –            | –                |
| <b>2018: N enrolled</b>       | 4              | –            | 4                |
| Number of LSMs <sup>(a)</sup> | 2              | –            | 2                |
| Age in years <sup>(a)</sup>   | 56 (52.5–60.5) | –            | 56 (52.5–60.5)   |
| Sex M <sup>(b)</sup>          | –              | –            | –                |
| <b>2019: N enrolled</b>       | –              | –            | –                |

<sup>(a)</sup> either median (IQR) or the value when it was constant; <sup>(b)</sup> N (%)

**Supplementary table S3:** Descriptive statistics for patients with fatty liver disease. For each year, the number of enrolled patients is specified, with their age at enrollment and the number of LSM values recorded across the analyzed 13-year period.

| Number of patients            | Total<br>N=532 | NAFLD<br>N=136 | NASH<br>N=186    | ALD<br>N=165 | ASH<br>N=32  | BASH<br>N=13 |
|-------------------------------|----------------|----------------|------------------|--------------|--------------|--------------|
| 2007: N enrolled              | 23             | 6              | 9                | 1            | 7            | –            |
| Number of LSMs <sup>(a)</sup> | 2 (2–3)        | 2.5 (2–4)      | 2 (2–3)          | 3            | 2 (2–2)      | –            |
| Age in years <sup>(a)</sup>   | 51 (38–53)     | 49.5 (48–52)   | 38 (27–52)       | 44           | 54 (51–58.5) | –            |
| Sex M <sup>(b)</sup>          | 16 (69.6%)     | 2 (33.3%)      | 7 (77.8%)        | –            | 7 (100%)     | –            |
| 2008: N enrolled              | 61             | 8              | 25               | 22           | 5            | 1            |
| Number of LSMs <sup>(a)</sup> | 2 (2–3)        | 2 (2–2.5)      | 2 (2–3)          | 2 (2–3)      | 2 (2–2)      | 3            |
| Age in years <sup>(a)</sup>   | 53 (44–59)     | 44.5 (35–53.5) | 50 (41–55)       | 57 (52–60)   | 51 (49–58)   | 35           |
| Sex M <sup>(b)</sup>          | 48 (78.7%)     | 6 (75.0%)      | 17 (68.0%)       | 19 (86.4%)   | 5 (100%)     | 1 (100%)     |
| 2009: N enrolled              | 55             | 8              | 19               | 20           | 5            | 3            |
| Number of LSMs <sup>(a)</sup> | 2 (2–4)        | 2 (2–3)        | 2 (2–3.5)        | 3 (2.5–4)    | 2 (2–2)      | 2 (2–2.5)    |
| Age in years <sup>(a)</sup>   | 53 (44–56.5)   | 47.50 (42–52)  | 47 (40–55.5)     | 54.5 (52–61) | 53 (50–57)   | 60 (57–61)   |
| Sex M <sup>(b)</sup>          | 43 (78.2%)     | 6 (75.0%)      | 12 (63.2%)       | 17 (85.0%)   | 5 (100%)     | 3 (100%)     |
| 2010: N enrolled              | 56             | 10             | 20               | 21           | 3            | 2            |
| Number of LSMs <sup>(a)</sup> | 2.5 (2–4)      | 2.5 (2–4)      | 2 (2–3.5)        | 3 (2–4)      | 2 (2–2.5)    | 3 (2–4)      |
| Age in years <sup>(a)</sup>   | 54 (46–58.5)   | 56.5 (50–61)   | 50.5 (44.5–56.5) | 55 (46–59)   | 54 (50–56)   | 48 (41–55)   |
| Sex M <sup>(b)</sup>          | 42 (75.0%)     | 5 (50.0%)      | 14 (70.0%)       | 18 (85.7%)   | 3 (100%)     | 3 (100%)     |

|                               |              |              |                |                |              |            |
|-------------------------------|--------------|--------------|----------------|----------------|--------------|------------|
| 2011: N enrolled              | 40           | 3            | 18             | 17             | –            | 2          |
| Number of LSMs <sup>(a)</sup> | 2.5 (2–4)    | 3 (2.5–3.5)  | 2 (2–4)        | 3 (2–4)        | –            | 2.5 (2–3)  |
| Age in years <sup>(a)</sup>   | 55 (50–57.5) | 54 (52–57.5) | 55 (47–58)     | 53 (50–56)     | –            | 57         |
| Sex M <sup>(b)</sup>          | 26 (65.0%)   | 2 (66.7%)    | 5 (27.8%)      | 17 (100%)      | –            | 2 (100%)   |
| 2012: N enrolled              | 44           | 21           | 10             | 9              | 2            | 2          |
| Number of LSMs <sup>(a)</sup> | 2 (2–2)      | 2 (2–2)      | 2 (2–3)        | 2 (2–2)        | 2            | 3          |
| Age in years <sup>(a)</sup>   | 54 (50–59)   | 57 (51–60)   | 53.5 (42–62)   | 54 (50–56)     | 52 (51–53)   | 49 (44–44) |
| Sex M <sup>(b)</sup>          | 29 (65.9%)   | 11 (52.4%)   | 5 (50.0%)      | 9 (100%)       | 2 (100%)     | 2 (100%)   |
| 2013: N enrolled              | 42           | 14           | 16             | 10             | 1            | 1          |
| Number of LSMs <sup>(a)</sup> | 2 (2–3)      | 2 (2–2)      | 3 (2–4)        | 2 (2–3)        | 3            | 2          |
| Age in years <sup>(a)</sup>   | 57 (48–61)   | 54.5 (45–59) | 56.5 (46–61.5) | 58 (54–62)     | 59           | 76         |
| Sex M <sup>(b)</sup>          | 25 (59.5%)   | 9 (64.3%)    | 5 (31.2%)      | 10 (100%)      | 1 (100%)     | 1 (100%)   |
| 2014: N enrolled              | 50           | 21           | 13             | 15             | 1            | –          |
| Number of LSMs <sup>(a)</sup> | 2 (2–3)      | 2 (2–3)      | 2 (2–3)        | 3 (2–3)        | 2            | –          |
| Age in years <sup>(a)</sup>   | 56.5 (53–60) | 58 (55–61)   | 53 (43–55)     | 58 (54.5–61.5) | 55           | –          |
| Sex M <sup>(b)</sup>          | 34 (68.0%)   | 11 (52.4%)   | 9 (69.2%)      | 14 (93.3%)     | –            | –          |
| 2015: N enrolled              | 45           | 14           | 19             | 8              | 3            | 1          |
| Number of LSMs <sup>(a)</sup> | 2 (2–2)      | 2 (2–2)      | 2 (2–2)        | 2.5 (2–3.5)    | 2            | 3          |
| Age in years <sup>(a)</sup>   | 58 (48–62)   | 58 (48–62)   | 58 (52–61.5)   | 58 (47.5–67)   | 65 (49.5–65) | 56         |

|                                  |                 |                         |                         |                  |                |             |
|----------------------------------|-----------------|-------------------------|-------------------------|------------------|----------------|-------------|
| Sex M <sup>(b)</sup>             | 26<br>(57.8%)   | 7<br>(50.0%)            | 7<br>(36.8%)            | 8 (100%)         | 3(100%)        | 1<br>(100%) |
| 2016: N<br>enrolled              | 45              | 11                      | 16                      | 17               | 1              | –           |
| Number<br>of LSMs <sup>(a)</sup> | 2 (2–2)         | 2 (2–3)                 | 2 (2–2.5)               | 2 (2–2)          | 2              | –           |
| Age in<br>years <sup>(a)</sup>   | 60 (54–<br>65)  | 57 (51–<br>59.5)        | 59.5<br>(51.5–<br>63)   | 64 (56–<br>66)   | 36             | –           |
| Sex M <sup>(b)</sup>             | 30<br>(66.7%)   | 6<br>(54.5%)            | 8<br>(50.0%)            | 15<br>(88.2%)    | 1 (100%)       | –           |
| 2017: N<br>enrolled              | 41              | 8                       | 16                      | 12               | 4              | 1           |
| Number<br>of LSMs <sup>(a)</sup> | 2 (2–2)         | 2 (2–2)                 | 2 (2–2)                 | 2 (2–3)          | 2 (2–2.5)      | 2           |
| Age in<br>years <sup>(a)</sup>   | 60 (54–<br>64)  | 55.5<br>(49.5–<br>61.5) | 61.5<br>(56.5–<br>65.5) | 58 (52–<br>61)   | 57 (55–<br>62) | 71          |
| Sex M <sup>(b)</sup>             | 27<br>(65.9%)   | 4<br>(50.0%)            | 7<br>(43.8%)            | 11<br>(91.7%)    | 4 (100%)       | 1<br>(100%) |
| 2018: N<br>enrolled              | 30              | 12                      | 5                       | 13               | –              | –           |
| Number<br>of LSMs <sup>(a)</sup> | 2               | 2                       | 2                       | 2                | –              | –           |
| Age in<br>years <sup>(a)</sup>   | 58.5<br>(54–63) | 61 (58.5–<br>63.5)      | 53 (44–<br>58)          | 64 (59–<br>70.5) | –              | –           |
| Sex M <sup>(b)</sup>             | 18<br>(60.0%)   | 6<br>(50.0%)            | 2<br>(40.0%)            | 10<br>(76.9%)    | –              | –           |
| 2019: N<br>enrolled              | –               | –                       | –                       | –                | –              | –           |

<sup>(a)</sup> either median (IQR) or the value when it was constant; <sup>(b)</sup> N (%)
